# Supplementary material
Source: publisher figshare collection journal article supplement (https://acs.figshare.com/ndownloader/files/4251745)
Supplement: Supplementary file 1 [file 4251745]

## **Positive and Negative Photoion Spectroscopy Study of Monochlorothiophenes**

Yun-Feng Xu,<sup>1</sup> Shan Xi Tian,<sup>1,a)</sup> Liuli Chen,<sup>1</sup> Fu-Yi Liu,<sup>2</sup> and Liusi Sheng<sup>2</sup>

<sup>1</sup>*Hefei National Laboratory for Physical Sciences at the Microscale and Department of Chemical Physics, University of Science and Technology of China, Hefei, Anhui 230026, China*

<sup>2</sup>*National Synchrotron Radiation Laboratory, University of Science and Technology of China, Hefei, Anhui 230029, China*

a) Corresponding author. E-mail: sxtian@ustc.edu.cn

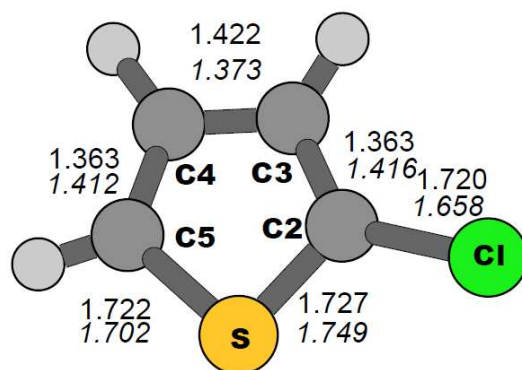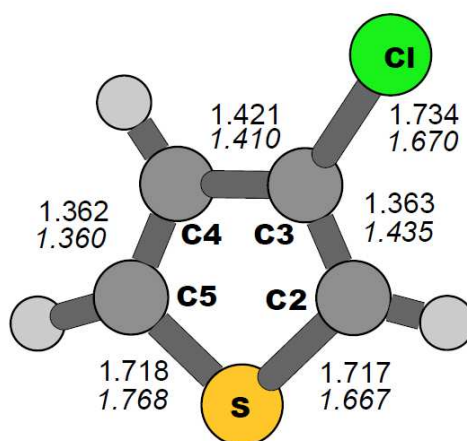

**Figure S1.** Optimized geometrical parameters (bond lengths in angstrom) and energies (in Hartree) of the neutral (normal) and cationic (italic) monochlorothiophenes.

$m/z=92$

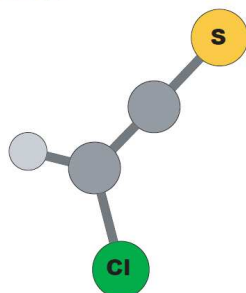

$C_2HCIS^+$  (1)  
( $C_s, ^2A''$ : -934.897312H)

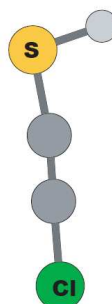

$C_2HCIS^+$  (2)  
( $C_s, ^2A''$ : -934.865311H)

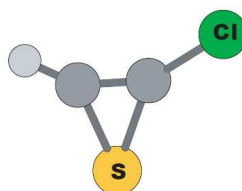

$C_2HCIS^+$  (3)  
( $C_s, ^2A''$ : -934.870208H)

$m/z=83$

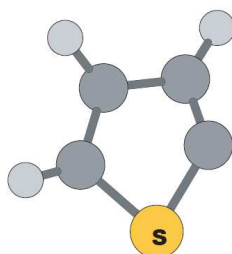

$2-C_4H_3S^+$   
( $C_1, ^1A'$ : -552.009095H)

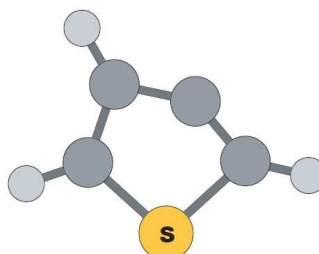

$3-C_4H_3S^+$   
( $C_s, ^1A'$ : -552.026326H)

**Figure S2.** Optimized geometries of some predominant daughter cations with  $m/z = 92$  and 83 (the total energies in Hartree).

$m/z=82$

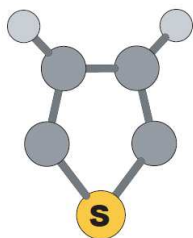

C<sub>4</sub>H<sub>2</sub>S<sup>+</sup> (1)  
(C<sub>2v</sub>, <sup>2</sup>A<sub>2</sub>: -551.337845H)

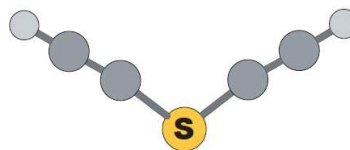

C<sub>4</sub>H<sub>2</sub>S<sup>+</sup> (2)  
(C<sub>2v</sub>, <sup>2</sup>B<sub>1</sub>: -551.384220H)

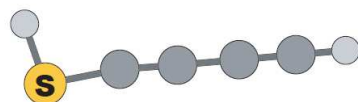

C<sub>4</sub>H<sub>2</sub>S<sup>+</sup> (3)  
(C<sub>S</sub>, <sup>2</sup>A<sup>+</sup>: -551.416934H)

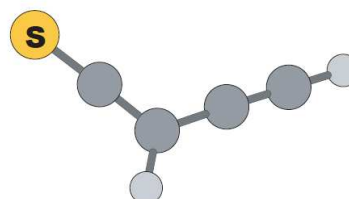

C<sub>4</sub>H<sub>2</sub>S<sup>+</sup> (4)  
(C<sub>S</sub>, <sup>2</sup>A<sup>+</sup>: -551.441709H)

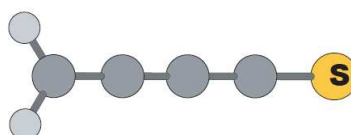

C<sub>4</sub>H<sub>2</sub>S<sup>+</sup> (5)  
(C<sub>2v</sub>, <sup>2</sup>B<sub>1</sub>: -551.459417H)

**Figure S3.** Optimized geometries of some predominant daughter cations with  $m/z = 82$  (the total energies in Hartree).

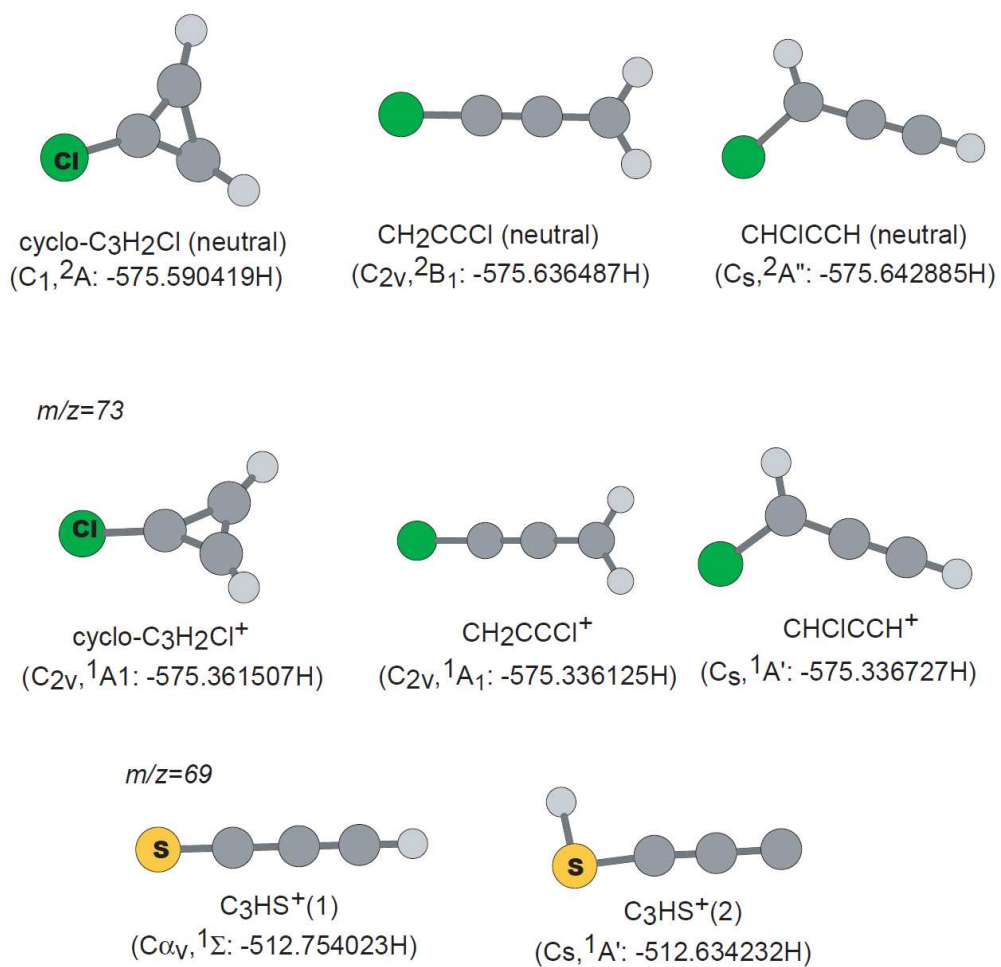

**Figure S4.** Optimized geometries of some predominant daughter cations with  $m/z$  =73 and 69 and the neutral fragments (at the top panels), all energies in Hartree.

$m/z=57$

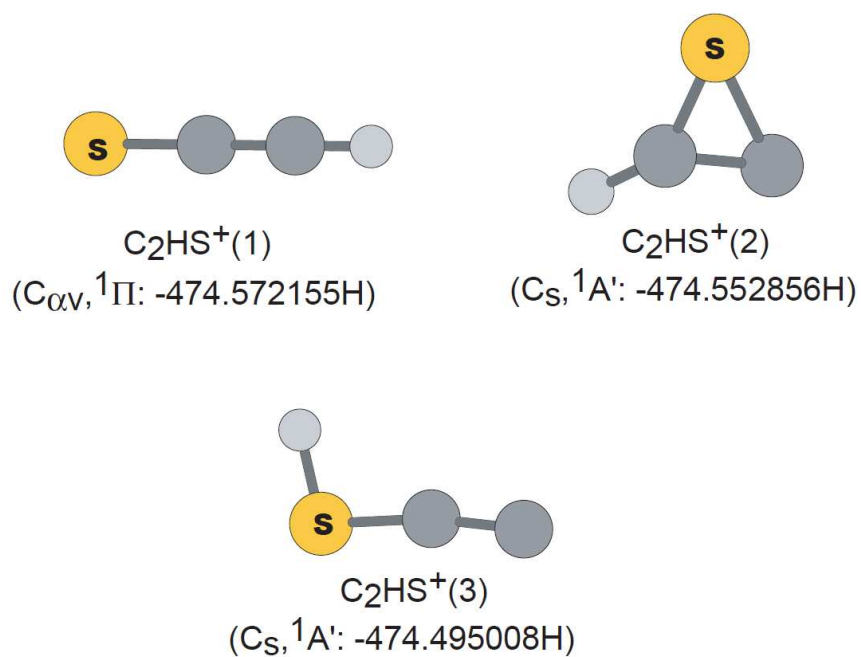

$m/z=39$

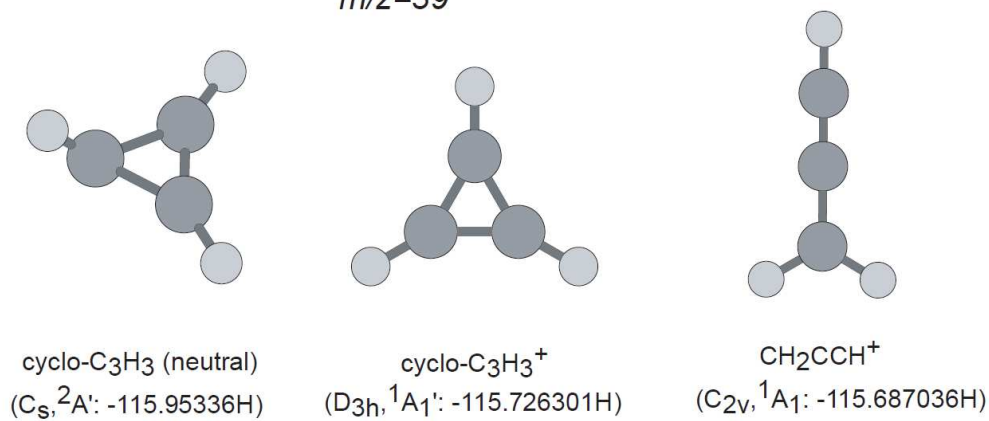

**Figure S5.** Optimized geometries of some predominant daughter cations with  $m/z = 57$  and 39 and the neutral fragment cyclo- $\text{C}_3\text{H}_3$ , all energies in Hartree
